# Supplementary material for: Tunable optofluidic birefringent lens
Source: Royal Society of Chemistry journal article supplement (doi:10.1039/c5sm02782a), 2016-01-01
Supplement: c5sm02782a1.pdf [file c5sm02782a1.pdf]

## Electronic Supplementary Information (ESI)

### Tunable optofluidic birefringent lens

Dongho Wee<sup>a</sup>, Soon Hyoung Hwang<sup>a</sup>, Young Seok Song<sup>b,\*</sup>, Jae Ryoun Youn<sup>a,\*</sup>

<sup>a</sup>Research Institute of Advanced Materials (RIAM), Department of Materials Science and Engineering, Seoul National University, Seoul, 08826, Republic of Korea

<sup>b</sup>Department of Fiber System Engineering, Dankook University, Gyeonggi-Do, 16890, Republic of Korea

**Table S1**

Material properties of 5CB and the mixture of 2,2,2-trifluoroethanol and cyclohexanol

| Material                                              | Parameters                                  |                                                                                                                                |
|-------------------------------------------------------|---------------------------------------------|--------------------------------------------------------------------------------------------------------------------------------|
| 5CB                                                   | Leslie viscosities, <sup>1</sup> [Pa s]     | $\alpha_1=-0.0060$ , $\alpha_2=-0.0812$ , $\alpha_3=-0.0036$ ,<br>$\alpha_4=0.0652$ , $\alpha_5=0.0640$ , $\alpha_6=-0.0208$ , |
|                                                       | Frank elastic constants, <sup>1</sup> [N]   | $K_1 = 6.2 \times 10^{-12}$ , $K_2 = 3.9 \times 10^{-12}$ , $K_3 = 8.2 \times 10^{-12}$                                        |
|                                                       | Dielectric constants, <sup>1</sup>          | $\epsilon_{  } = 18.5$ , $\epsilon_{\perp} = 7$ , $\epsilon_a = \epsilon_{  } - \epsilon_{\perp} = 11.5$                       |
|                                                       | Density, <sup>1</sup> [g cm <sup>-3</sup> ] | 1.02                                                                                                                           |
|                                                       | Refractive index                            | $n_e = 1.7360$ , $n_o = 1.5442$                                                                                                |
| Mixture of 2,2,2-trifluoroethanol<br>and cyclohexanol | Density, [g cm <sup>-3</sup> ]              | 1.166                                                                                                                          |
|                                                       | Viscosity, [Pa s]                           | 0.0047                                                                                                                         |
|                                                       | Refractive index <sup>a)</sup>              | 1.378                                                                                                                          |

<sup>a)</sup>calculated by the rule of mixture from the volume fraction of mixture. The refractive indices of 2,2,2-trifluoroethanol and cyclohexanol were 1.291 and 1.4641, respectively.

(a)

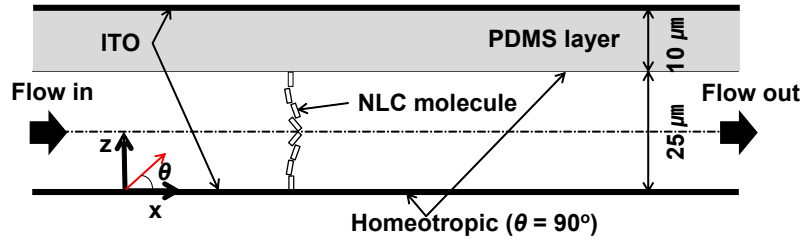

(b)

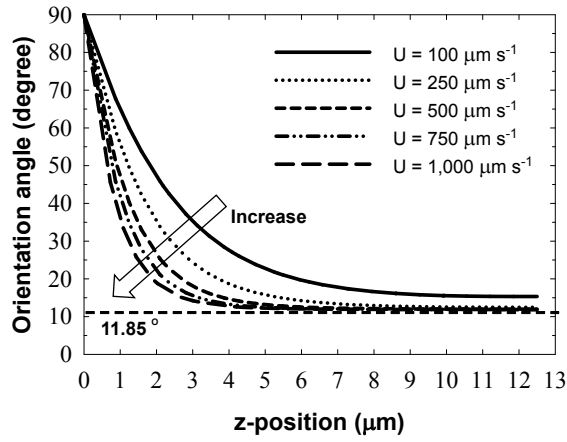

(c)

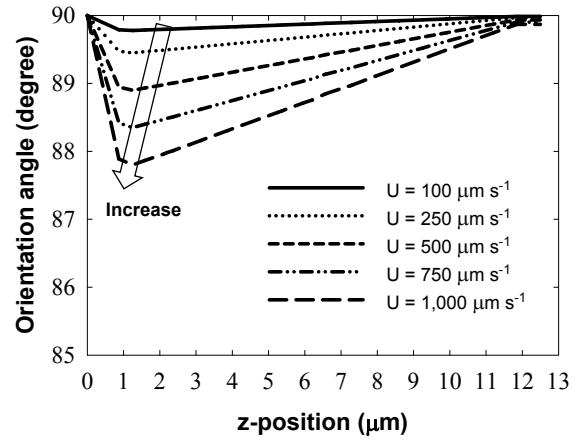

**Fig. S1** (a) geometry for the simulation of the director orientation. The director orientations: (b) without and (c) with the electric field.

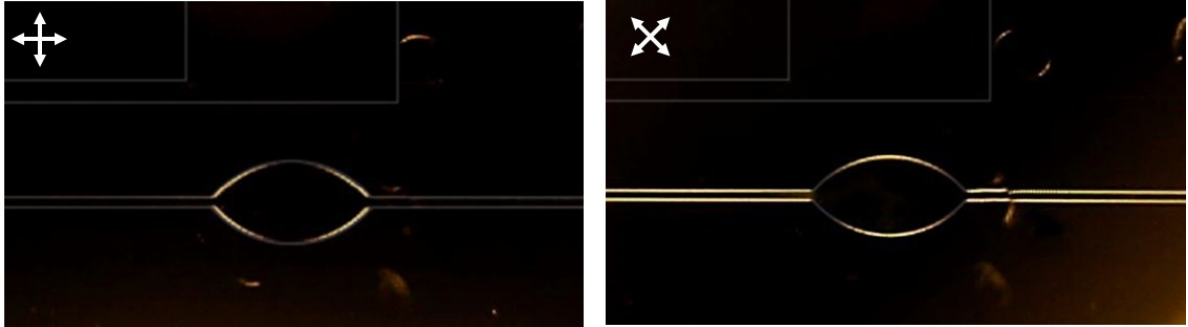

**Fig. S2** Director orientation in a microchannel at static state without electric field. The white arrows mean the transmission axes of crossed polarizers. These figures exhibit dark images in the biconvex-shaped expansion chamber, so that the homeotropic orientation was formed at static state in the microchannel.

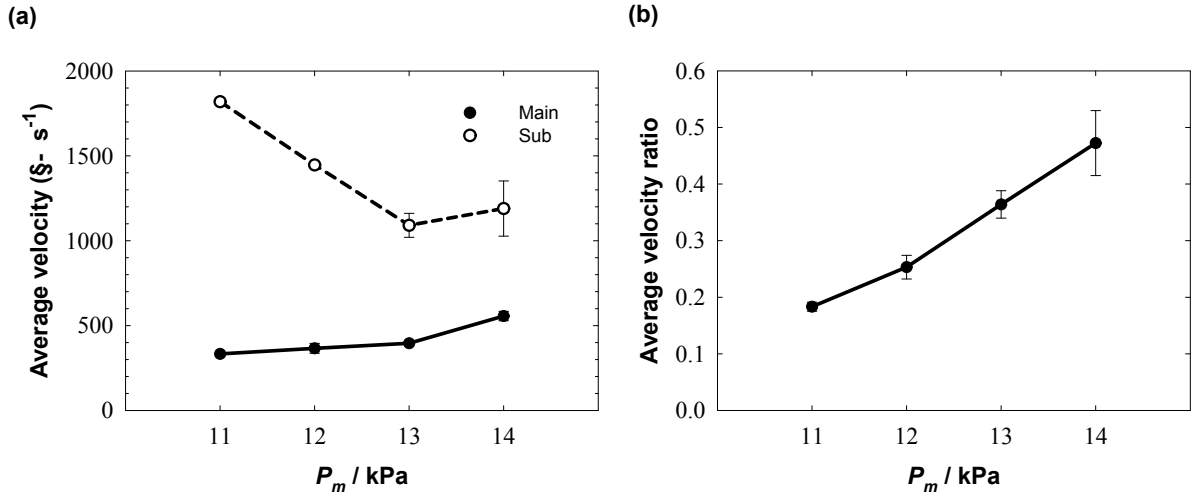

**Fig. S3** (a) average velocity and (b) average velocity ratio of the main flows and the sub-flows with respect to pressure for the main stream when the electric field (150 V, 50 kHz) is applied. The applied pressure for the sub-stream was fixed at 7 kPa.

a) Side view

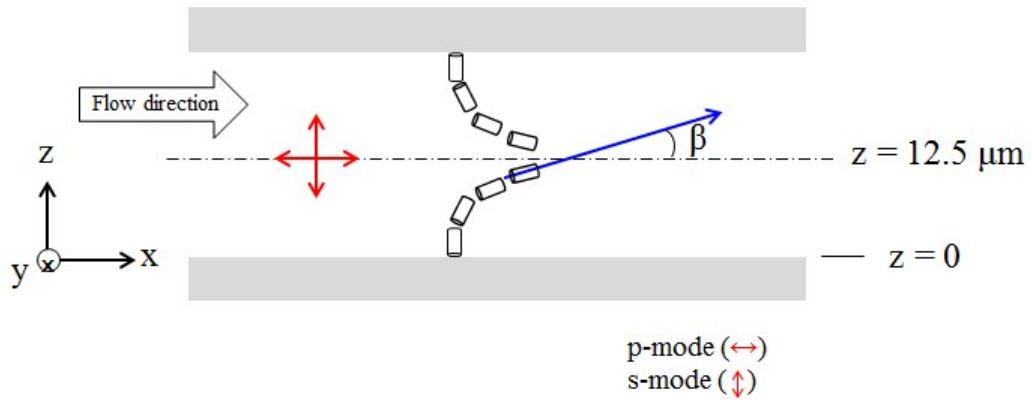

b) Top view

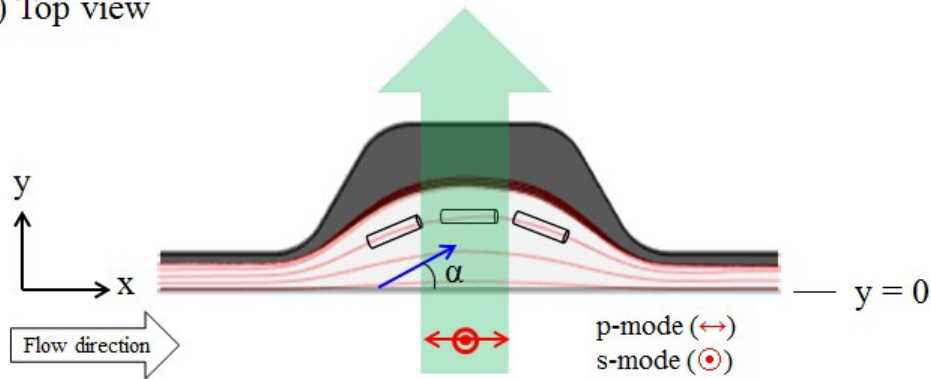

**Fig. S4** Schematic description of director orientation: (a) side and (b) top views of the channel. Red lines depicted in (b) represent the streamlines of main stream (NLC).

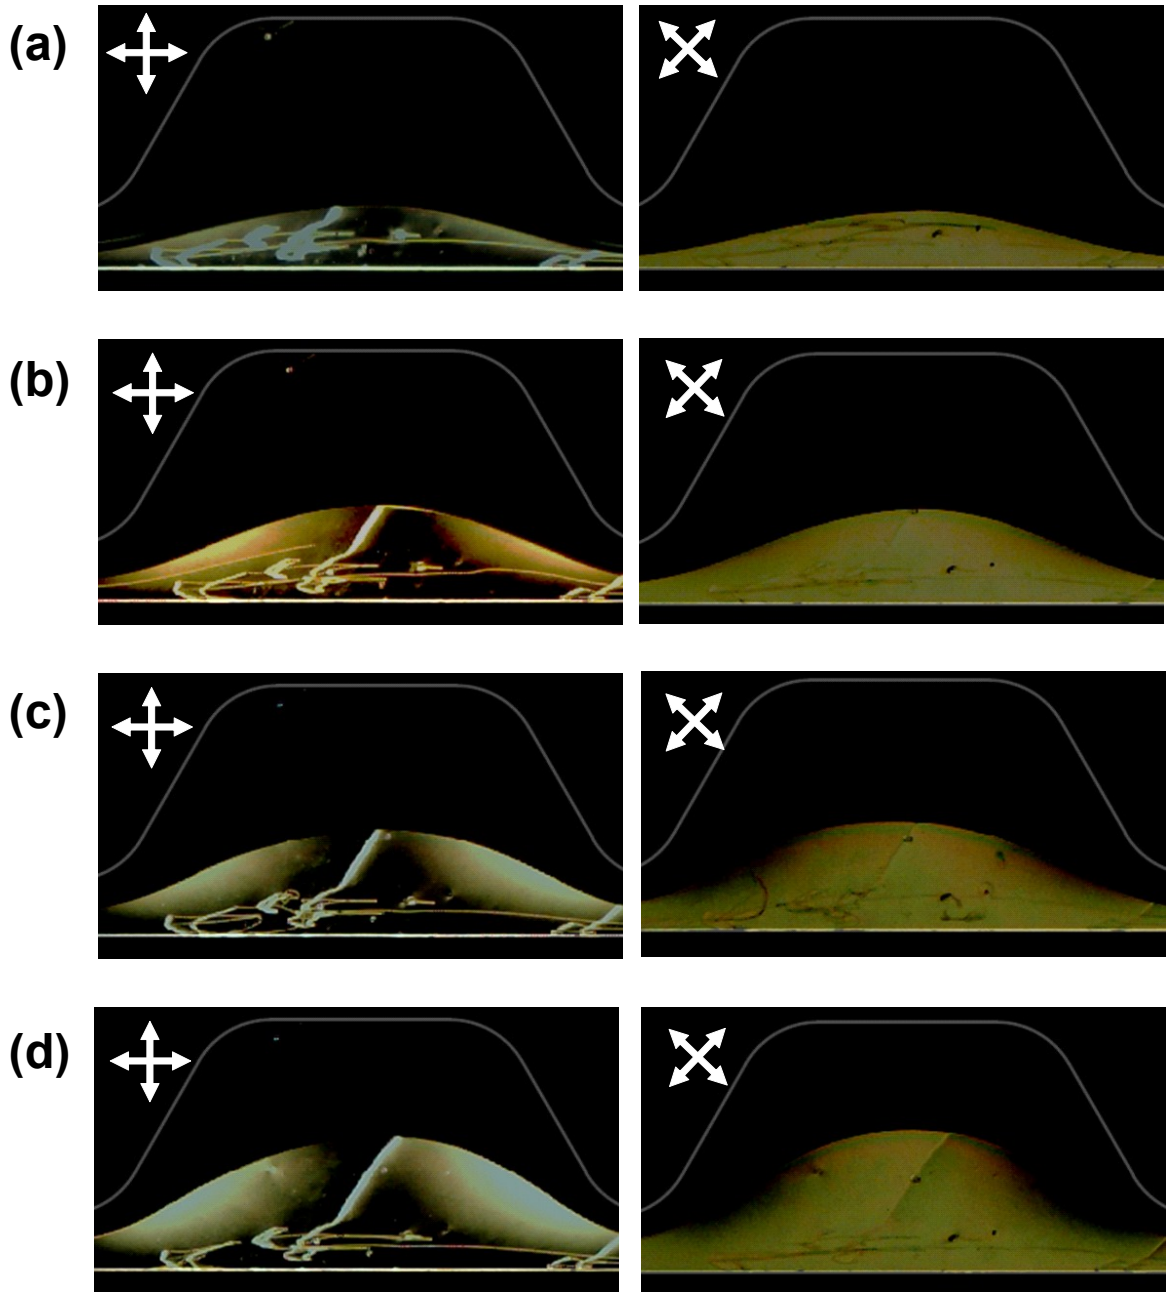

**Fig. S5** Microscopic images of the expansion chamber without the electric field at (a)  $P_m = 8$  kPa,  $P_s = 7$  kPa, (b)  $P_m = 9$  kPa,  $P_s = 7$  kPa, (c)  $P_m = 10$  kPa,  $P_s = 7$  kPa, and (d)  $P_m = 11$  kPa,  $P_s = 7$  kPa, respectively. These images correspond to the enlarged images of Fig. 5b in the manuscript. The white arrows represent the transmission axes of crossed polarizers.

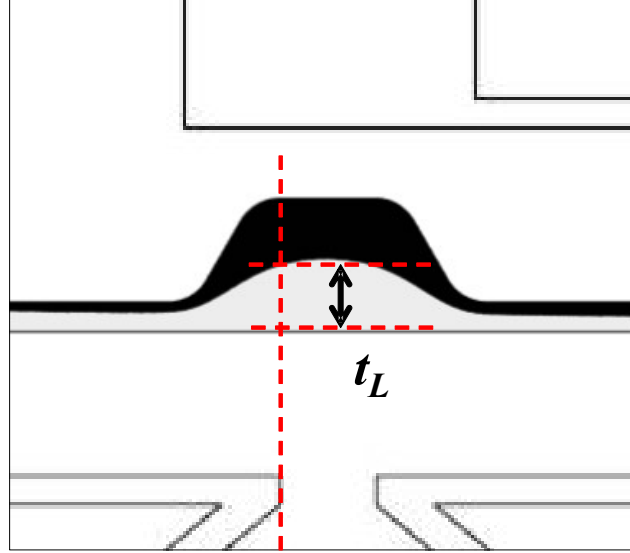

**Fig. S6** Illustration for the definition of the lens thickness, which indicates the thickness of the main stream at the edge of aperture.

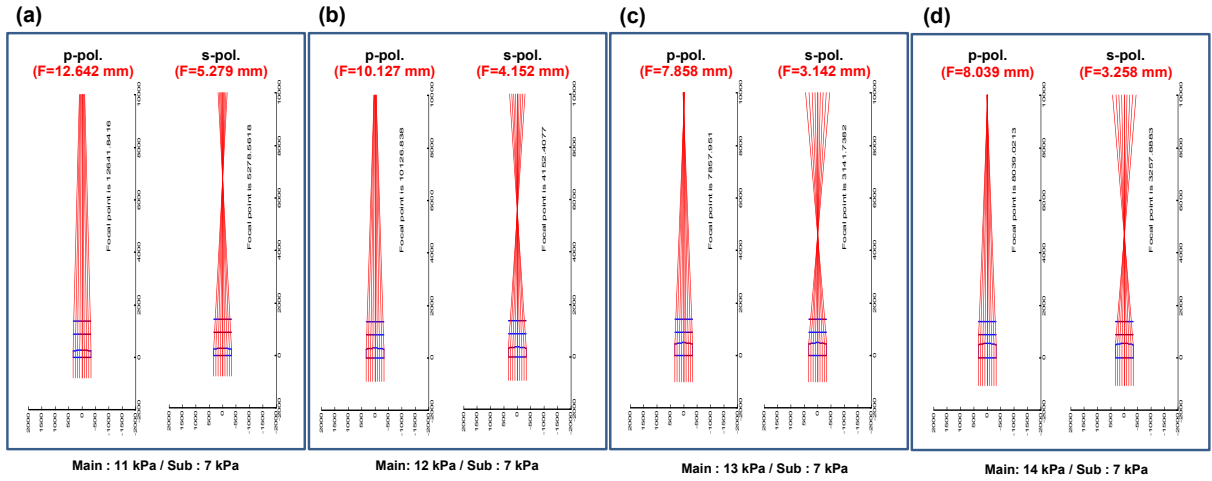

**Fig. S7** The focal length (F) calculated by using MATLAB at (a)  $P_m = 11$  kPa,  $P_s = 7$  kPa, (b)  $P_m = 12$  kPa,  $P_s = 7$  kPa, (c)  $P_m = 13$  kPa,  $P_s = 7$  kPa, and (d)  $P_m = 14$  kPa,  $P_s = 7$  kPa.

## Reference

- 1 I. W. Stewart, *The static and dynamic continuum theory of liquid crystals: a mathematical introduction*, Taylor & Francis, 2004.
